# Supplementary material
Source: publisher figshare collection journal article supplement (https://acs.figshare.com/ndownloader/files/5125270)
Supplement: Supplementary file 1 [file 5125270]

# Thermodynamic Analysis of Interactions between *N*-linked Sugar Chains and Fbs1

Shinya Hagihara, Kiichiro Totani, Ichiro Matsuo, and Yukishige Ito

1

## Supporting Information

### Contents

|                               |    |
|-------------------------------|----|
| Experimental procedure        | S2 |
| NMR data for target compounds | S6 |
| ITC data                      | S9 |

**General Procedures.** Reagents and solvents were purchased from standard suppliers and used without further purification. Reactions were monitored with TLC plates precoated with Merck silica gel 60 F254. Merck silica gel-60 was used for silica gel flash chromatography.  $^1\text{H}$  and  $^{13}\text{C}$  NMR spectra were measured on a JEOL EX-400 spectrometer. Coupling constants ( $J$  values) are represented in hertz. MALDI-TOF MS was recorded in the positive ion mode on a AXIMA-CFR (Shimazu) equipped with a nitrogen laser with an emission wavelength of 337 nm.

## Compound 12

To a solution of acceptor **10** (1.6 g, 2.7 mmol), donor **11** (1.8 g, 2.8 mmol), and NIS (3.0 g, 13.3 mmol) in dry dichloromethane (60 ml) containing MS4A (20 g), TfOH (0.3 ml, 3.4 mmol) was added dropwise under Ar. The mixture was stirred at  $-78^\circ\text{C}$  for 1 h, diluted with AcOEt, and filtered through Celite. The filtrate was washed with 10%  $\text{Na}_2\text{SO}_3$ ,  $\text{NaHCO}_3$ , and brine. The organic layer was dried over  $\text{Na}_2\text{SO}_4$  and evaporated *in vacuo*. The residue was purified by silica gel column chromatography (hexane:AcOEt, 3:1) to afford **12** (2.9 g, 98%):  $^1\text{H}$  NMR (400 Hz,  $\text{CDCl}_3$ )  $\delta$  = 7.68-6.79 (m, 33 H, Ar), 5.31 (d, 1 H,  $J$  = 8.4 Hz), 5.13 (t, 1 H,  $J$  = 9.2 Hz), 4.93 (d, 1 H,  $J$  = 8.0 Hz), 4.79 (d, 1 H,  $J$  = 12.8 Hz), 4.66 (d, 1 H,  $J$  = 12.4 Hz), 4.58 (d, 1 H,  $J$  = 12.4 Hz), 1.90 (s, 3 H); MALDI-TOFMS  $\text{C}_{65}\text{H}_{60}\text{N}_2\text{NaO}_{14}$  calcd: 1115.39, found: 1114.68 ( $\text{M} + \text{Na}$ ) $^+$ .

## Compound 13

To a solution of **12** (6.3 g, 5.8 mmol) in THF (20 ml) containing 30%  $\text{H}_2\text{O}_2$  (20 ml), LiOH (0.2 g, 8.7 mmol) was added at  $0^\circ\text{C}$ . The mixture was stirred at  $0^\circ\text{C}$  for 12 h, diluted with AcOEt, and washed with  $\text{H}_2\text{O}$  and brine. The organic layer was dried over  $\text{Na}_2\text{SO}_4$  and evaporated *in vacuo*. The residue was purified by silica gel column chromatography (hexane:AcOEt, 2:1) to give compound **13** (5.5 g, 90%):  $^1\text{H}$  NMR (400 Hz,  $\text{CDCl}_3$ )  $\delta$  = 7.69-6.80 (33 H, Ar), 5.30 (d, 1 H,  $J$  = 8.0 Hz), 4.94 (d, 1 H,  $J$  = 8.0 Hz), 4.78 (d, 1H,  $J$  = 12.0 Hz), 4.76 (d, 1 H,  $J$  = 12.0 Hz), 4.68 (d, 1 H,  $J$  = 12.0 Hz), 3.81 (t, 1 H,  $J$  = 8.8 Hz), 3.70 (dd, 1 H,  $J$  = 10.0 and 4.4 Hz), 3.54 (dd, 2 H,  $J$  = 10.0 and 6.4 Hz), 3.43 (dd, 1 H,  $J$  = 11.2 and 3.6 Hz); MALDI-TOFMS  $\text{C}_{63}\text{H}_{58}\text{N}_2\text{NaO}_{13}$  calcd: 1073.38, found: 1073.67 ( $\text{M} + \text{Na}$ ) $^+$ .

## Compound 15

With cooling in ice-water, DDQ (1.1 g, 4.8 mmol) was added to a stirred mixture of **13** (4.0 g, 3.8 mmol), **14** (3.0 g, 4.6 mmol), and molecular sieves 4A (3 g) in CH<sub>2</sub>Cl<sub>2</sub> (20 ml) under Ar. The mixture was stirred at room temperature for 3 h, quenched with an aqueous solution of ascorbic acid (0.7%)-citric acid (1.3%)-NaOH (0.9%), stirred for 5 min, diluted with AcOEt, and filtered through Celite. The filtrate was washed with NaHCO<sub>3</sub> and brine. The organic layer was dried over Na<sub>2</sub>SO<sub>4</sub> and evaporated *in vacuo*. The residue was mixed with 2,6-di-*tert*-butyl-4-methylpyridine (3.1 g, 15.2 mmol) and molecular sieves 4A (6 g) in CH<sub>2</sub>ClCHH<sub>2</sub>Cl (50 ml) and stirred at room temperature. Then, a solution of MeOTf in CH<sub>2</sub>ClCH<sub>2</sub>Cl (1 M, 3.8 ml) was added at 0°C. The mixture was stirred at 45°C for 12 h, quenched with Et<sub>3</sub>N, diluted with EtOAc, and filtered through Celite. The filtrate was washed with water, NaHCO<sub>3</sub>, and brine, dried over Na<sub>2</sub>SO<sub>4</sub>, and evaporated *in vacuo*. The residue was purified by silica gel column chromatography (hexane:AcOEt, 3:1) to afford **15** (5.0 g, 87%): <sup>1</sup>H NMR (400 MHz, CDCl<sub>3</sub>)  $\delta$  = 7.76-6.64 (43 H, Ar), 5.13 (d, 1 H, *J* = 8.4 Hz), 4.85 (d, 1H, *J* = 8.4 Hz), 4.74 (d, 1 H, *J* = 12.4 Hz), 4.72 (d, 1 H, *J* = 12.4 Hz), 4.60 (d, 1 H, *J* = 12.4 Hz), 4.45 (s, 1 H), 4.43 (d, 1 H, *J* = 12.4 Hz), 4.36 (d, 1 H, *J* = 12.4 Hz), 4.30 (d, 1 H, *J* = 12.4 Hz), 4.28 (d, 1 H, *J* = 12.4 Hz), 4.24 (dd, 1 H, *J* = 10.8 and 8.4 Hz), 2.65 (m, 1 H), 1.03 (s, 9H); MALDI-TOFMS C<sub>91</sub>H<sub>94</sub>N<sub>2</sub>NaO<sub>18</sub>Si calcd: 1553.62, found: 1553.60 (M + Na)<sup>+</sup>; Anal. (C<sub>91</sub>H<sub>94</sub>N<sub>2</sub>O<sub>18</sub>Si) calcd: C, 70.97; H, 6.15; N, 1.78; found: C, 71.07; H, 6.13; N, 1.57.

## Compound 16

To a solution of **15** (470 mg, 0.30 mmol) in pyridine (2 ml), acetic anhydride (1 ml) was added under ice-cooling. The mixture was stirred at room temperature for 1 h and evaporated under reduced pressure. The residue was dissolved with CH<sub>3</sub>CN, and *p*-TsOH (143 mg, 0.75 mmol) was added. The mixture was stirred at room temperature over night, diluted with AcOEt, and washed with NaHCO<sub>3</sub> and brine. The extract was evaporated *in vacuo*. The residue was dissolved in DMF (1 mL) containing 10% HF/pyridine (Aldrich). It was compressed to 1.0 GPa and left at 30°C for 12 h and the resulting mixture was diluted

with AcOEt and washed with NaHCO<sub>3</sub> and brine, successively. The organic layer was dried over Na<sub>2</sub>SO<sub>4</sub> and evaporated *in vacuo*. The residue was purified by silica gel column chromatography (hexane:AcOEt, 10:1–1:2) to afford 260 mg (70%) of compound **16**; <sup>1</sup>H NMR (400 Hz, CDCl<sub>3</sub>)  $\delta$  = 7.83–6.72 (33 H, Ar), 5.25 (d, 1 H, *J* = 8.0 Hz), 5.16 (d, 1 H, *J* = 3.2 Hz), 4.93 (d, 1 H, *J* = 8.0 Hz), 4.88 (d, 1 H, *J* = 12.4 Hz), 4.82 (d, 1 H, *J* = 12.0 Hz), 4.69 (bs, 1 H), 4.68 (d, 1 H, *J* = 12.4 Hz), 4.58 (d, 1 H, *J* = 12.0 Hz), 4.50 (s, 2 H), 4.48 (d, 1 H, *J* = 12.0 Hz), 4.47 (d, 1 H, *J* = 12.4 Hz), 4.42 (d, 1 H, *J* = 12.4 Hz), 4.35 (d, 1 H, *J* = 12.0 Hz), 3.09 (m, 1 H), 2.13 (s, 3 H); <sup>13</sup>C NMR (CDCl<sub>3</sub>) (anomeric carbons)  $\delta$  = 98.08, 97.00, 96.87; MALDI-TOFMS C<sub>71</sub>H<sub>70</sub>N<sub>2</sub>NaO<sub>19</sub> calcd: 1277.45, found: 1278.04 (M + Na)<sup>+</sup>; Anal. (C<sub>71</sub>H<sub>70</sub>N<sub>2</sub>O<sub>19</sub>) calcd: C, 67.93; H, 5.62; N, 2.23; found: C, 67.45; H, 5.92; N, 2.02.

### Compound 18, 19 and 20

A mixture of AgOTf (88 mg, 340  $\mu$ mol) and molecular sieves (500 mg) in dry toluene (1 ml) was stirred at 0°C for 30 min and then cooled at –30°C. A solution of donor **8** (80 mg, 160  $\mu$ mol) and acceptor **7** (126 mg, 100  $\mu$ mol) in dry CH<sub>2</sub>ClCH<sub>2</sub>Cl (4 ml) was added dropwise over 5 min. The reaction mixture was stirred at –30°C (1h) and at ambient temperature (12 h). The reaction was quenched with Et<sub>3</sub>N (0.1 ml). The mixture was diluted with EtOAc and filtered through Celite. The filtrate was washed with NaHCO<sub>3</sub> and brine. The solution was dried over Na<sub>2</sub>SO<sub>4</sub> and evaporated *in vacuo*. The residue was purified by silica gel column chromatography (hexane/AcOEt) to afford the compounds **18** (74 mg, 34%), **19** (27 mg, 16%), and **20** (40 mg, 23%), and the remaining acceptor **16** (27 mg, 22%);

Compound **18**; <sup>1</sup>H NMR (400 Hz, CDCl<sub>3</sub>)  $\delta$  = 7.87–6.69 (63 H, Ar), 5.39 (bs, 1 H), 5.33 (d, 1 H, *J* = 2.8 Hz), 5.27 (bs, 1 H), 5.20 (d, 1 H, *J* = 8.4 Hz), 5.19 (bs, 1 H), 4.90 (d, 1 H, *J* = 8.4 Hz), 2.10 (s, 3 H), 2.05 (s, 3 H), 1.95 (s, 3 H); <sup>13</sup>C NMR (CDCl<sub>3</sub>) (anomeric carbons)  $\delta$  = 99.2, 99.0, 97.7, 96.9, 96.8; MALDI-TOF MS C<sub>129</sub>H<sub>130</sub>N<sub>2</sub>NaO<sub>31</sub> calcd: 2225.86, found: 2226.16 (M + Na)<sup>+</sup>; Anal. (C<sub>129</sub>H<sub>130</sub>N<sub>2</sub>O<sub>31</sub>) calcd: C, 70.29; H, 5.94; N, 1.27; found: C, 70.5; H, 5.77; N, 1.21.

Compound **19**;  $^1\text{H}$  NMR (400 Hz,  $\text{CDCl}_3$ )  $\delta$  = 7.84-6.73 (48 H, Ar), 5.32 (bs, 1 H), 5.24 (d, 1 H,  $J$  = 8.0 Hz), 5.21 (bs, 1 H), 5.12 (d, 1 H, 3.0 Hz), 4.93 (d, 1 H,  $J$  = 8.4 Hz), 2.13 (s, 3 H), 2.11 (s, 3 H);  $^{13}\text{C}$  NMR ( $\text{CDCl}_3$ ) (anomeric carbons)  $\delta$  = 98.4, 98.3, 97.0, 96.9; MALDI-TOFMS  $\text{C}_{100}\text{H}_{100}\text{N}_2\text{NaO}_{25}$  calcd: 1751.65, found: 1752.25 ( $\text{M} + \text{Na}$ ) $^+$ ; Anal. ( $\text{C}_{100}\text{H}_{100}\text{N}_2\text{O}_{25}$ ) calcd: C, 69.43; H, 5.83; N, 1.62; found: C, 69.13; H, 5.61; N, 1.55.

Compound **20**;  $^1\text{H}$  NMR (400 Hz,  $\text{CDCl}_3$ )  $\delta$  = 7.78-6.71 (48 H, Ar), 5.25 (bs, 1 H), 5.21 (d, 1 H,  $J$  = 8.0 Hz), 5.17 (bs, 1 H), 4.91 (d, 1 H,  $J$  = 8.4 Hz), 2.99 (m, 1 H), 2.11 (s, 3 H), 2.04 (s, 3 H), 1.97 (s, 3 H);  $^{13}\text{C}$  NMR ( $\text{CDCl}_3$ ) (anomeric carbons)  $\delta$  = 98.14, 98.13, 97.02, 96.92; MALDI-TOFMS  $\text{C}_{100}\text{H}_{100}\text{N}_2\text{NaO}_{25}$  calcd: 1751.65, found: 1751.90 ( $\text{M} + \text{Na}$ ) $^+$ ; Anal. ( $\text{C}_{100}\text{H}_{100}\text{N}_2\text{O}_{25}$ ) calcd: C, 69.43; H, 5.83; N, 1.62; found: C, 69.14; H, 5.70; N, 1.57.

#### Deprotection procedure

A solution of protected oligosaccharide (200 mg) in *n*-butanol (2 ml) containing ethylenediamine (0.5 ml) was stirred at 90°C for 15 h. Volatiles were removed by evaporation *in vacuo* and the residue was dissolved in pyridine (2 ml) and  $\text{Ac}_2\text{O}$  (1 ml) was added. The solution was stirred for 3 h and evaporated *in vacuo*. The residue was dissolved in MeOH (5 ml) and 1 N NaOMe (0.1 ml) was added. The mixture was stirred at 60°C for 12 h, neutralized with Amberlyst 15 ( $\text{H}^+$ ) resin, filtered through Celite, and evaporated. The residue was hydrogenated in the presence of  $\text{Pd}(\text{OH})_2$  in 50% aq. MeOH at room temperature for 12 h. The mixture was filtered through Celite and the filtrate was concentrated *in vacuo*. The residue was purified with a Sep-Pak 18C cartridge (Waters) to afford free oligosaccharides.

**Man<sub>3</sub>GlcNAc<sub>2</sub> (4)**; <sup>1</sup>H NMR (400 Hz, D<sub>2</sub>O)  $\delta$  = 5.39 (s, 1 H), 5.31 (s, 1 H), 5.11 (s, 1H), 4.96 (s, 1 H), 4.90 (m, 1 H), 4.82 (m, 1 H), 2.27 (s, 3 H), 2.24 (s, 3 H); MALDI-TOFMS: C<sub>34</sub>H<sub>58</sub>N<sub>2</sub>NaO<sub>26</sub> calcd: 933.32; found: 933.14 (M + Na)<sup>+</sup>.

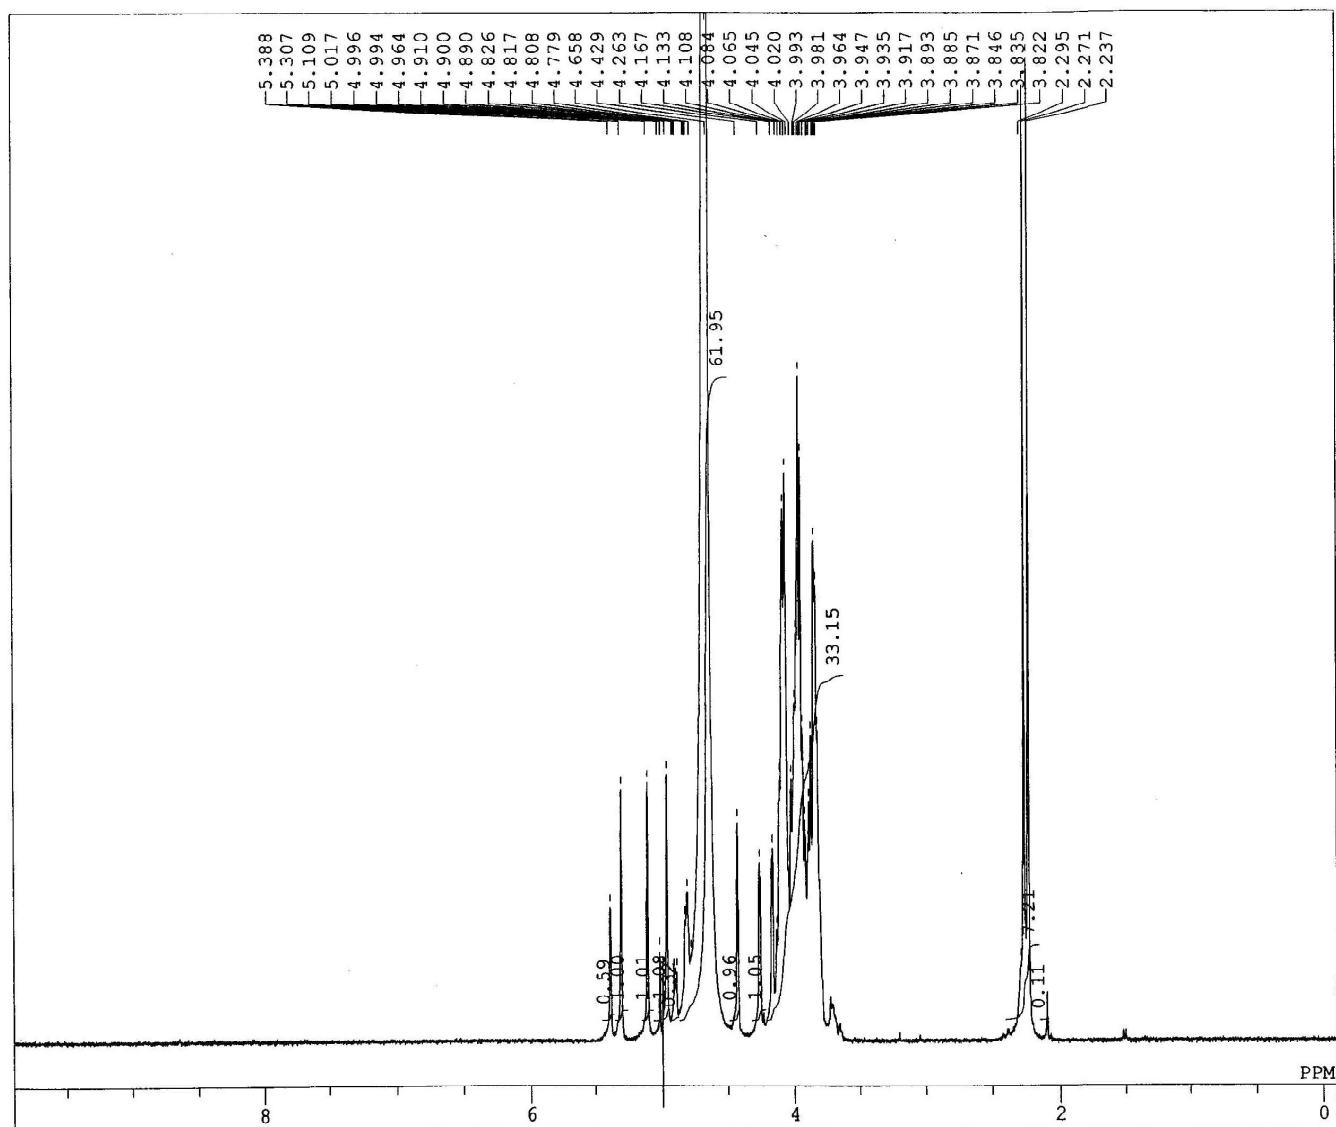

**Man** $\beta$ **1-6ManGlcNAc**<sub>2</sub> (**5**); <sup>1</sup>H NMR (400 Hz, D<sub>2</sub>O)  $\delta$  = 5.02 (s, 1 H), 4.75 (s, 1 H), 4.61 (s, 1 H), 4.53 (m, 1 H), 4.45 (m, 1 H), 1.92 (s, 3 H), 1.88 (s, 3 H); MALDI-TOFMS C<sub>28</sub>H<sub>48</sub>N<sub>2</sub>NaO<sub>21</sub> calcd: 771.26, found: 771.21 (M + Na)<sup>+</sup>.

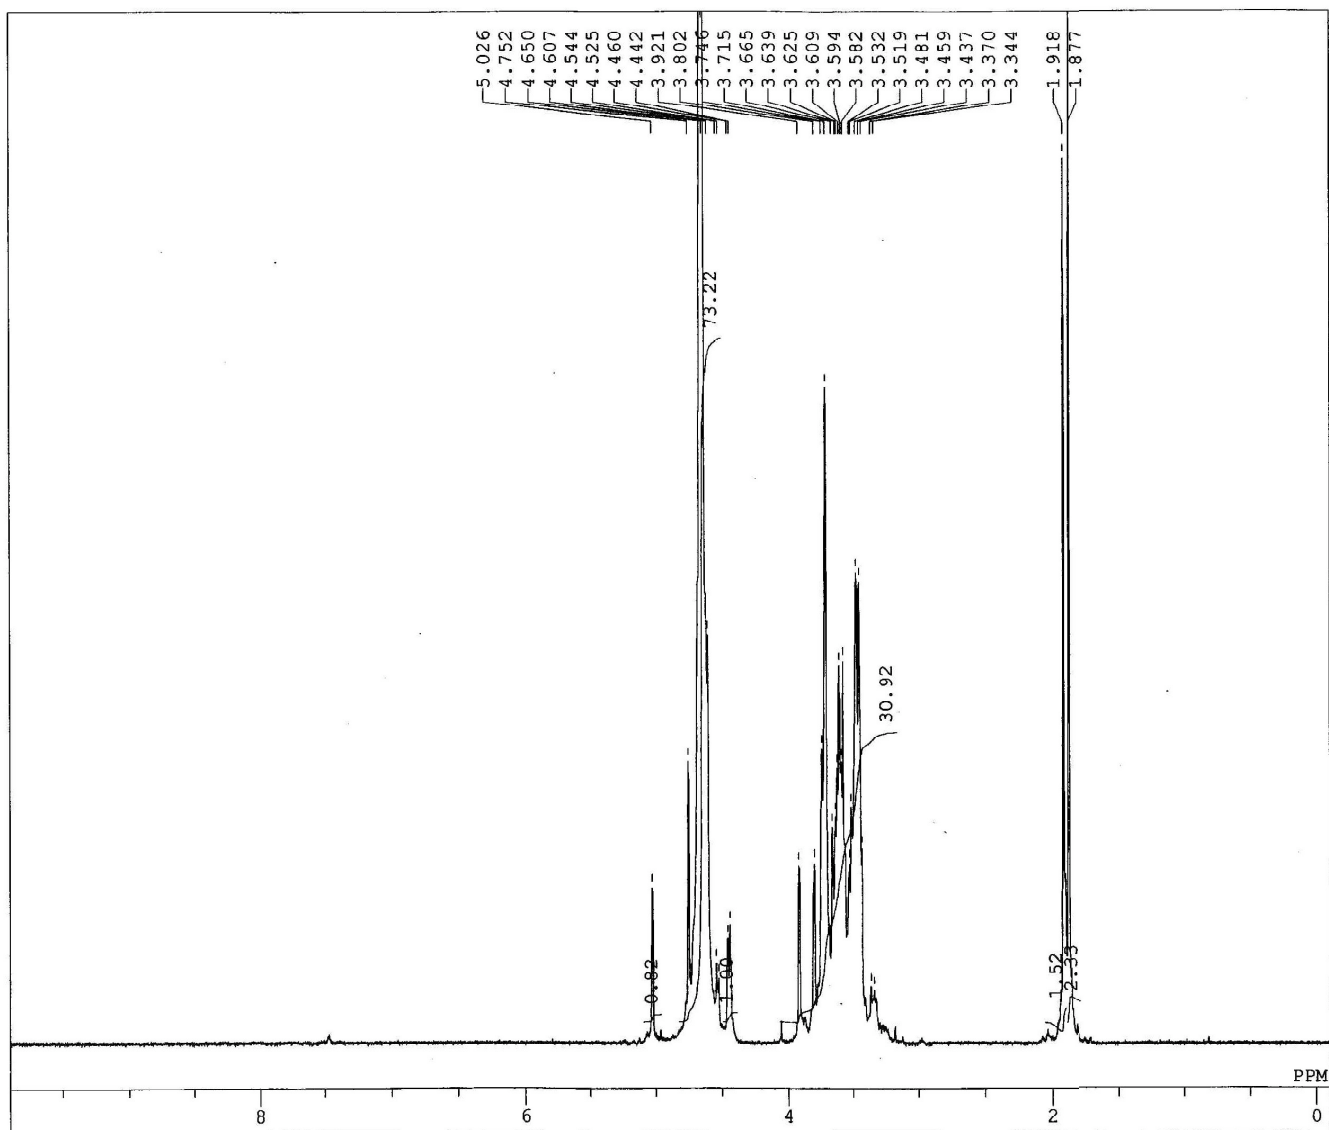

**Man** **1-3ManGlcNAc<sub>2</sub>** (**6**); <sup>1</sup>H NMR (400 Hz, D<sub>2</sub>O)  $\delta$  = 5.03 (s, 1 H), 4.94 (s, 1 H), 4.62 (s, 1 H), 4.54 (m, 1 H), 4.45 (m, 1 H), 1.90 (s, 3 H), 1.88 (s, 3 H); MALDI-TOFMS C<sub>28</sub>H<sub>48</sub>N<sub>2</sub>NaO<sub>21</sub> calcd: 771.26, found: 771.24 (M + Na)<sup>+</sup>.

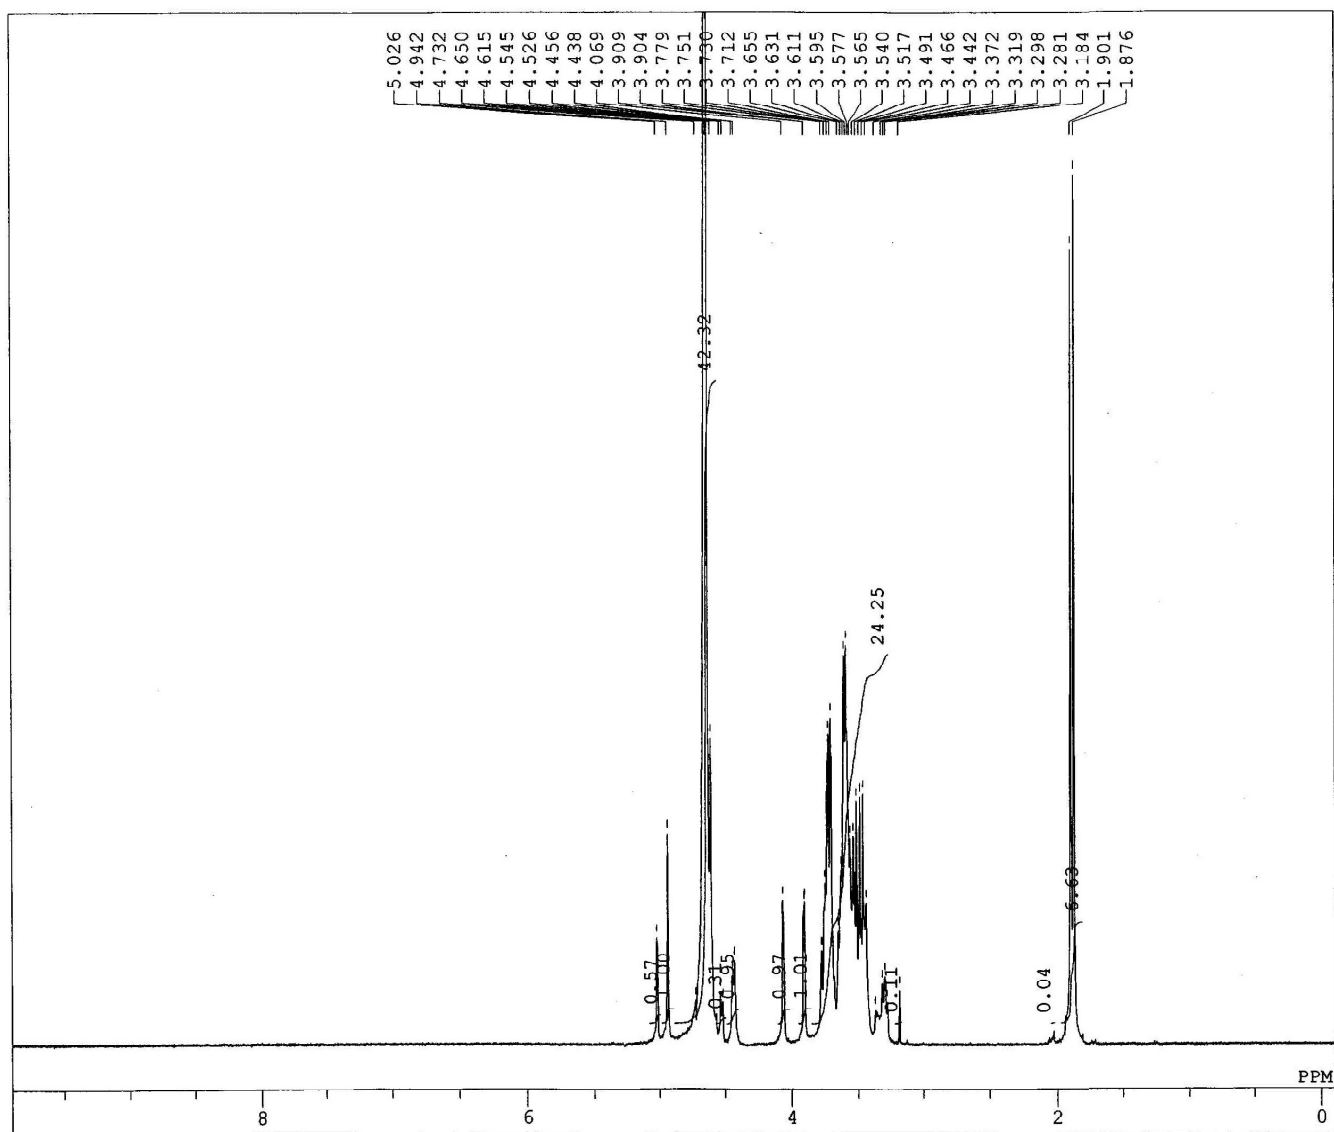



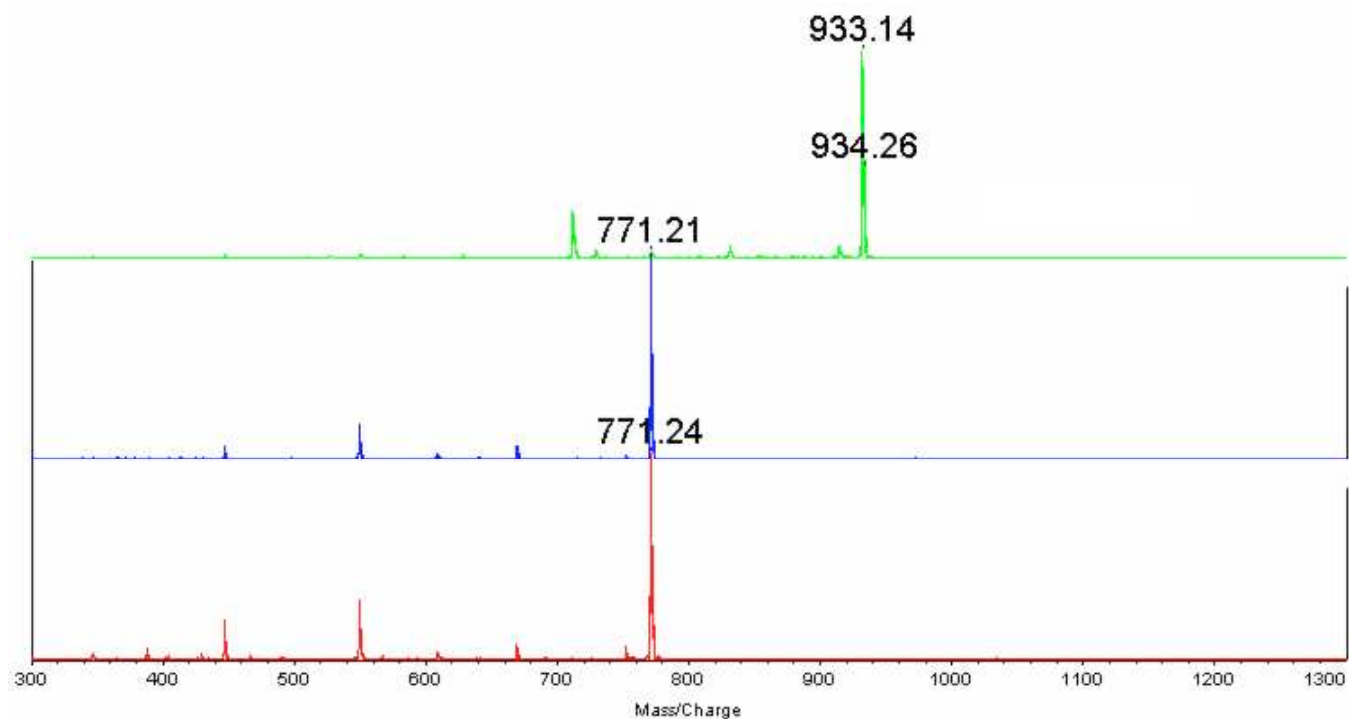

MALDI-TOF MS for Man<sub>3</sub>GlcNAc<sub>2</sub> (upper), Man1-6GlcNAc<sub>2</sub>(middle), and Man1-3GlcNAc<sub>2</sub>.

| Compound  | <sup>1</sup> H NMR | <sup>13</sup> C NMR | MALDI-TOF MS | Elemental analysis |
|-----------|--------------------|---------------------|--------------|--------------------|
| <b>12</b> | ✓                  |                     | ✓            |                    |
| <b>13</b> | ✓                  |                     | ✓            |                    |
| <b>15</b> | ✓                  |                     | ✓            | ✓                  |
| <b>16</b> | ✓                  | ✓                   | ✓            | ✓                  |
| <b>18</b> | ✓                  | ✓                   | ✓            | ✓                  |
| <b>19</b> | ✓                  | ✓                   | ✓            | ✓                  |
| <b>20</b> | ✓                  | ✓                   | ✓            | ✓                  |
| <b>4</b>  | ✓                  |                     | ✓            |                    |
| <b>5</b>  | ✓                  |                     | ✓            |                    |
| <b>6</b>  | ✓                  |                     | ✓            |                    |

**Isothermal titration calorimetry (ITC).** The experiment was conducted by adding 6  $\mu$ l of synthetic oligosaccharides (300  $\mu$ M) every 4 min into a PBS buffer (10 mM, pH 7.2) containing NaCl (100 mM) and Fbs1 (0 or 20  $\mu$ M) at 20 °C. Heats of dilution were measured in blank titrations by injecting oligosaccharides into the buffer and were subtracted from the binding heats. Thermodynamic parameters were determined by the nonlinear least-squares methods, using routines included in the Origin software package (MicroCal, version 7.0).

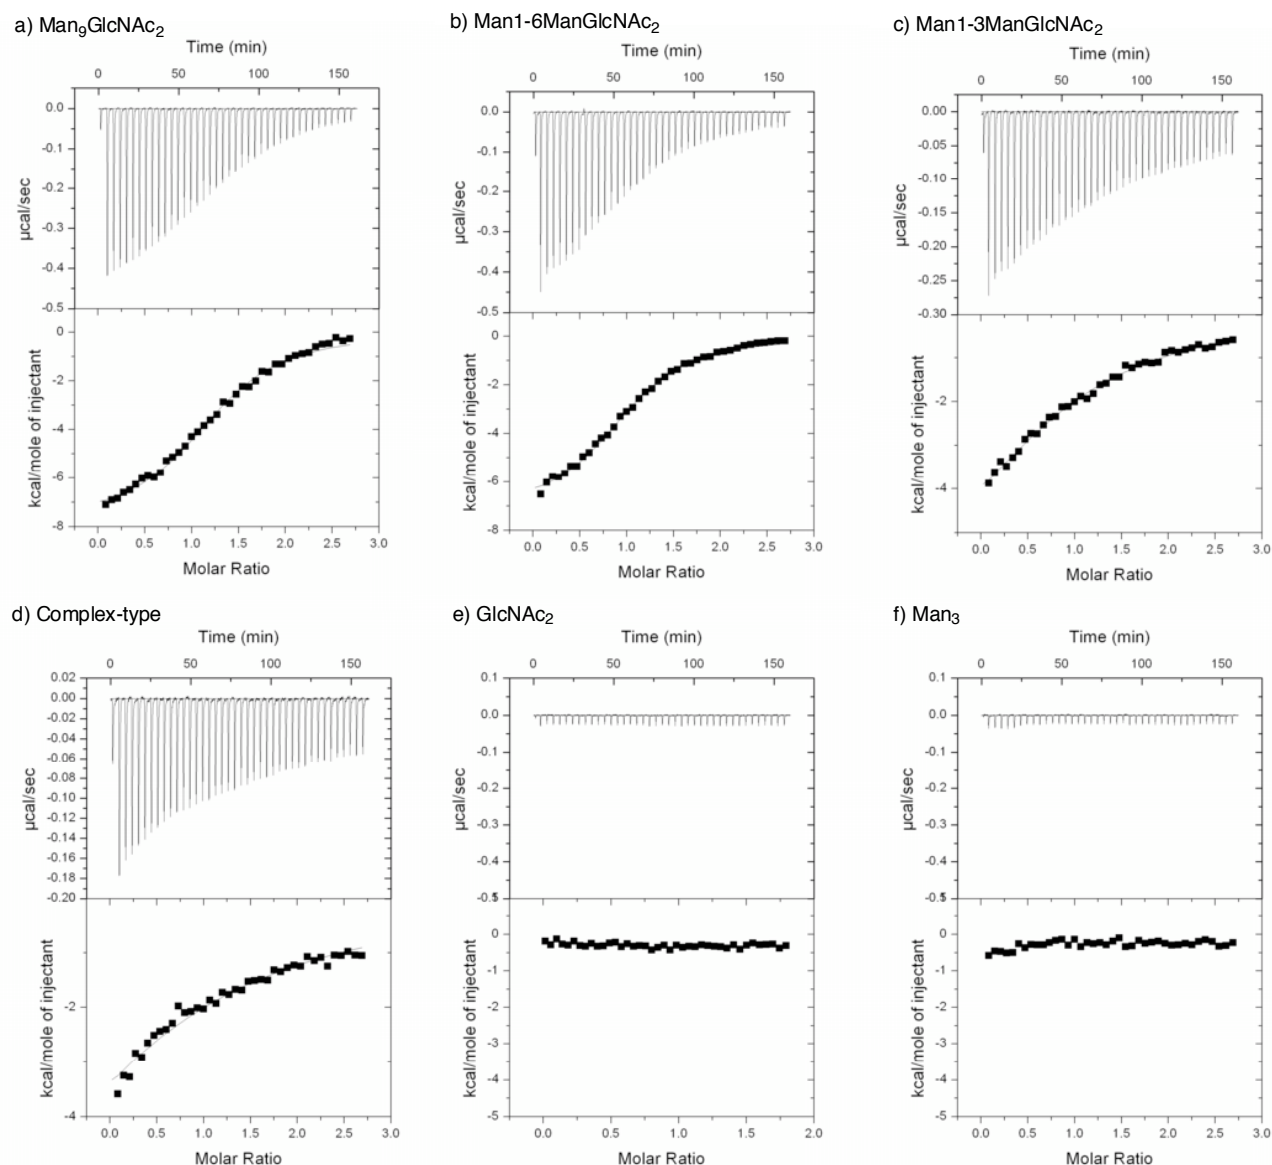

Figure. Isothermal titration calorimetric analysis for the binding of Fbs1 to a)  $\text{Man}_9\text{GlcNAc}_2$ , b)  $\text{Man1-6ManGlcNAc}_2$ , c)  $\text{Man1-3ManGlcNAc}_2$ , d) diantennary complex-type N-glycan, e)  $\text{GlcNAc}_2$ , and f)  $\text{Man}_3$ . Titration was conducted by injecting 6  $\mu$ l of oligosaccharide (300  $\mu$ M in PBS buffer) every 4 min into buffer solution (PBS) containing Fbs1 (20  $\mu$ M) at 20. Upper; Law ITC data, lower; Molar heat values plotted as a function of the molar ratio ([oligosaccharide]/[Fbs1]). The solid line represents the best-fit binding isotherm. The data were fitted using a single site model.
